# Supplementary material for: Effect of Nano-SiOx/Chitosan Complex Coating on the Physicochemical Characteristics and Preservation Performance of Green Tomato
Source: MDPI journal article supplement (doi:10.3390/molecules24244552), 2019-12-12
Supplement: s1 [file s1]

Figure S1.

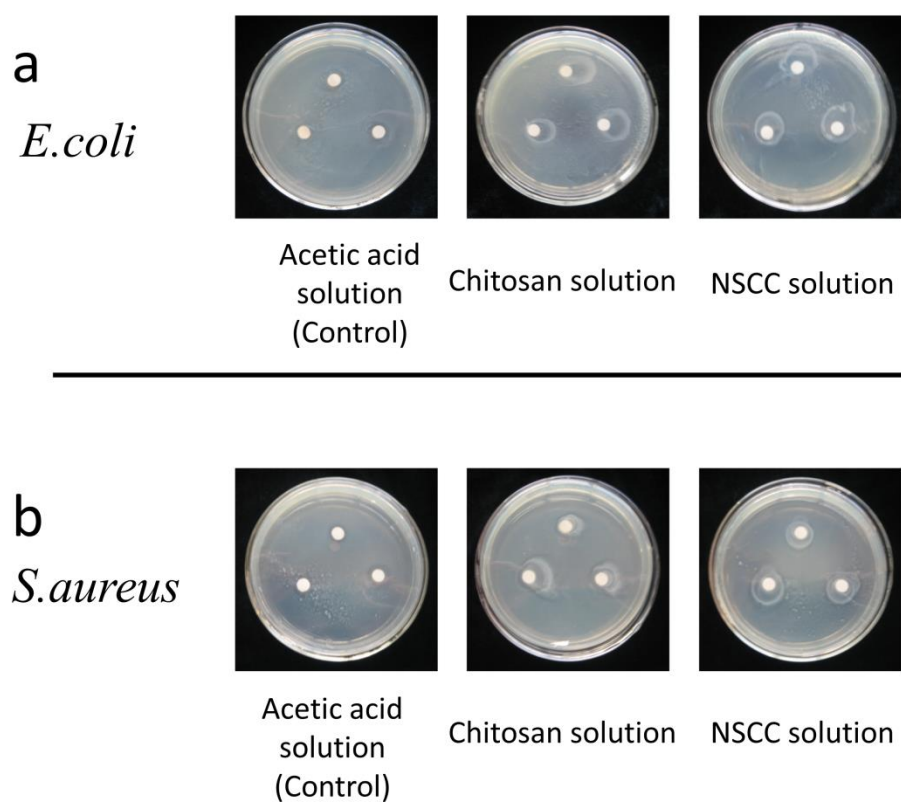

**Figure S1.** The effect of nano-SiOx/Chitosan complex solution on inhibition zone diameter of different bacteria.
